# Supplementary material
Source: Springer Nature journal article supplement (https://www.springermedizin.de/resource/supplementary/12933_2009_219_MOESM2_ESM.pdf/9539878)

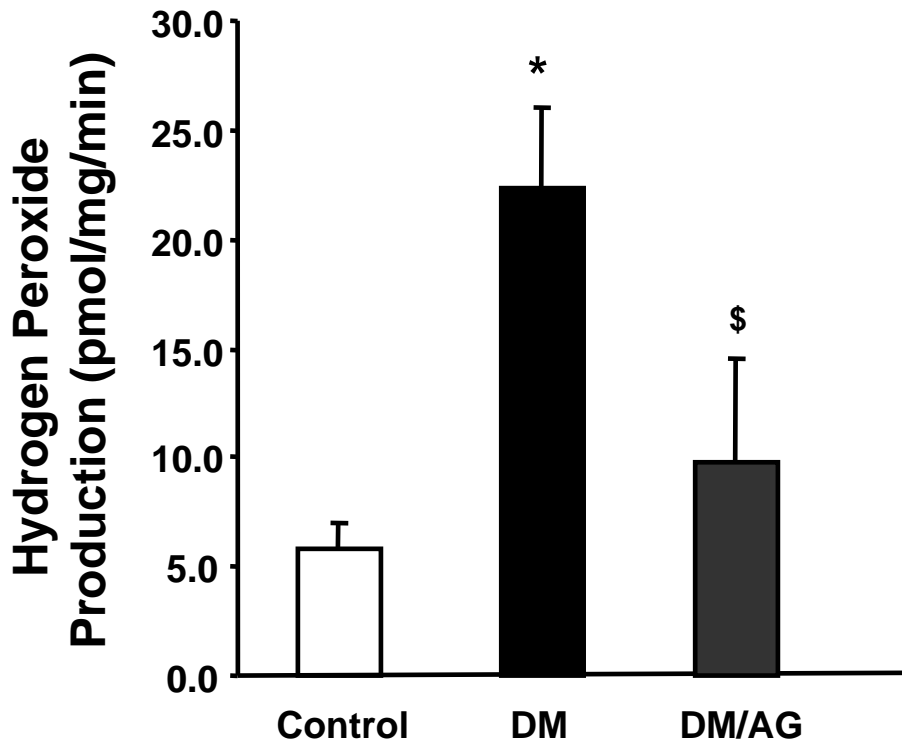

\* p<0.05 vs Control

\$ p<0.05 vs DM

Supplement: MOESM2 [file 9539878]
